# Supplementary material for: Au nanoparticle-decorated porous gallium nitride as an ultrasensitive substrate for surface enhanced Raman spectroscopy
Source: Royal Society of Chemistry journal article supplement (doi:10.1039/c4ra03927k), 2014-09-09
Supplement: c4ra03927k1.pdf [file c4ra03927k1.pdf]

**Supporting information for:**

**Au nanoparticles-decorated porous gallium nitride as ultrasensitive substrates for surface enhanced Raman spectroscopy**

Feng-Xiang Deng,<sup>a,b</sup> Yu Zhao,<sup>b</sup> Li-Feng Hu,<sup>b</sup> Tong Xu<sup>\*,a</sup>, Yong-Qiang Liu,<sup>b</sup> Ge-Bo Pan<sup>\*,b</sup>

<sup>a</sup> State Key Laboratory for Mechanical Behavior of Materials, Xi'an Jiaotong University, 710049, Xi'an; <sup>b</sup> Suzhou Institute of Nano-tech and Nano-bionics, Chinese Academy of Sciences, 215123 Suzhou, P. R. China

The scanning electron microscope (SEM) images were acquired on a Hitachi S4800 SEM and the surface roughness of samples was achieved by AFM-Dimension 3100. All SEM images were taken at 0 tilt angle and 4.2 mm working distance, with 20 kV accelerating voltage. The X-ray diffraction (XRD) patterns were obtained by D8 Advance of Bruker AXS. Raman spectra were obtained on a LabRam HR 800 confocal Raman microscopy with 532.8 nm laser. UV-vis spectra were obtained on a LAMBDA 750 UV/Vis/NIR Spectro-photometer(PerkinElmer).

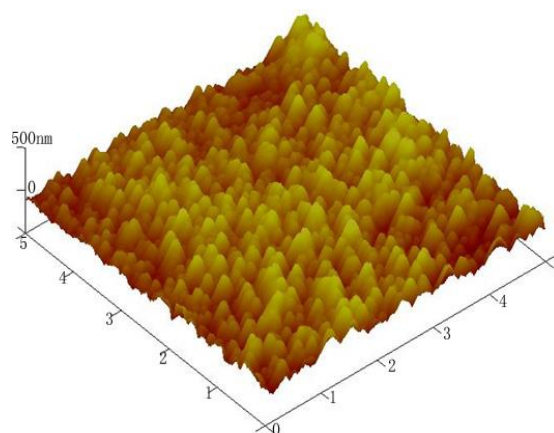

Fig. S1. AFM image of PGaN prepared by PEC etching in 0.5 molL<sup>-1</sup> H<sub>2</sub>SO<sub>4</sub>. The applied voltage was 6 V, and the etching time was 15 min.

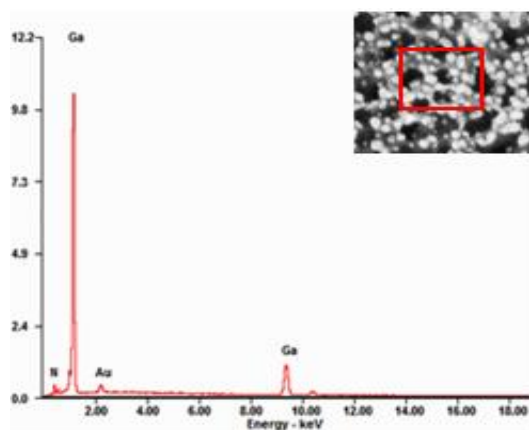

**Fig. S2.** EDX spectrum of Au/PGaN substrate.

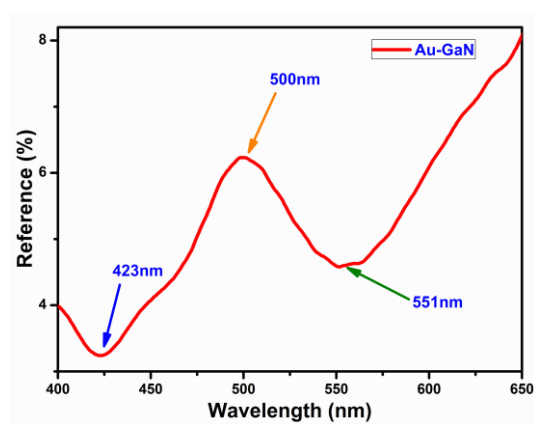

**Fig. S3.** Specular reflectance spectrum of Au/PGaN substrate.

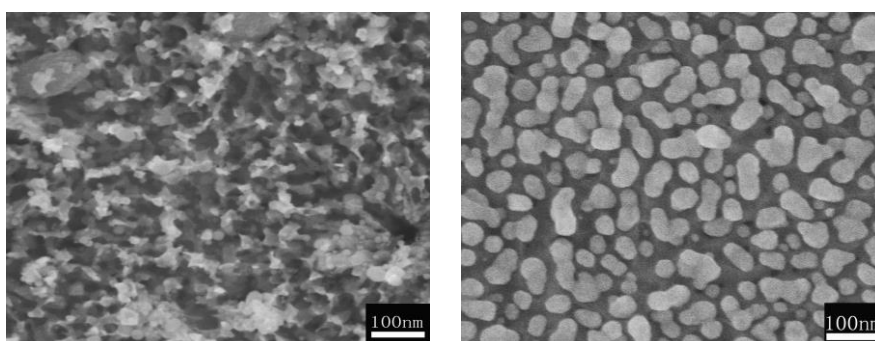

**Fig. S4.** SEM images of Au/PGaN substrates prepared with different cycles: (a) 2 and (b) 10 cycles.

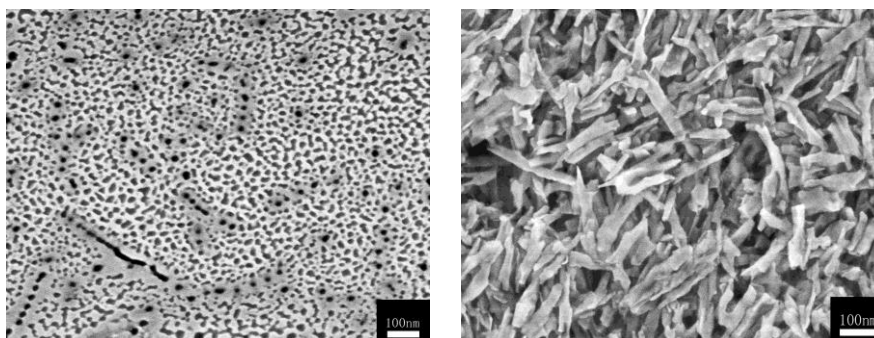

**Fig. S5.** SEM images of PGaN substrate prepared by PEC etching with different etching time: (a) 7 and (b) 25 min.

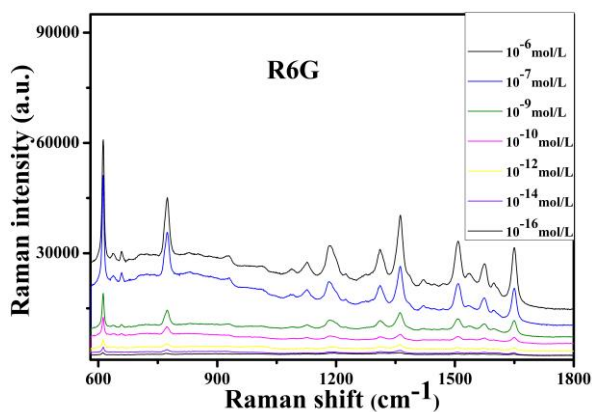

**Fig. S6.** Raman spectrum of different R6G concentration:  $10^{-6}$ ,  $10^{-7}$ ,  $10^{-9}$ ,  $10^{-10}$ ,  $10^{-12}$ ,  $10^{-14}$  and  $10^{-16}$  molL<sup>-1</sup>.

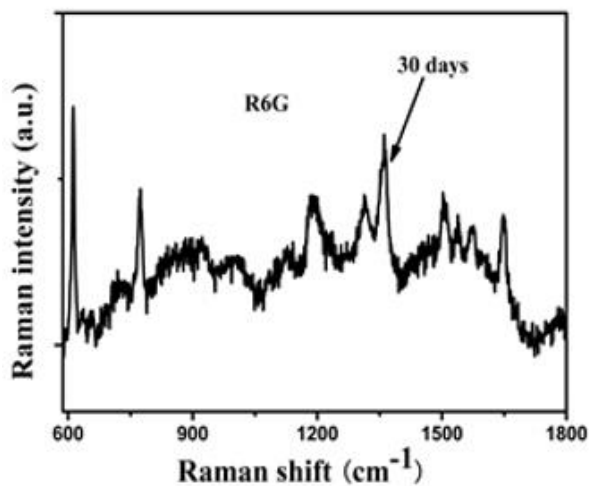

**Fig. S7.** Raman spectrum of  $10^{-16}$  molL<sup>-1</sup> R6G recorded after 30 days storage in air.
